# Supplementary material for: Two new pyrrolo[2,3-d]pyrimidines (7-deazapurines): ultrasonic-assisted synthesis, experimental and theoretical characterizations as well as antibacterial evaluation
Source: publisher site journal article supplement (doi:10.1515/znb-2017-0004), 2017-05-20

## Supporting Information

Simin Vazirimehr<sup>a</sup>, Abolghasem Davoodnia<sup>\*,a</sup>, S. Ali Beyramabadi<sup>a</sup>, Mahboobeh Nakhaei-Moghaddam<sup>b</sup>, Niloofar Tavakoli-Hoseini<sup>a,c</sup>

### **Two new pyrrolo[2,3-*d*]pyrimidines (7-deazapurines): Ultrasonic-assisted synthesis, experimental and theoretical characterizations as well as antibacterial evaluation**

DOI: 10.1515/znb-2017-0004

<sup>a</sup> Department of Chemistry, Mashhad Branch, Islamic Azad University, Mashhad, I. R. Iran

<sup>b</sup> Department of Biology, Mashhad Branch, Islamic Azad University, Mashhad, I. R. Iran

<sup>c</sup> Department of Biochemistry and Clinical Laboratories, Tabriz University of Medical Sciences, Tabriz, I. R. Iran

### **Contents**

S2–S3: Short explanation for the spectra of compounds **3** and **4**

S4: FT-IR spectrum of compound **3**

S5: <sup>1</sup>H NMR spectrum of compound **3**

S6: <sup>13</sup>C NMR spectrum of compound **3**

S7–S9: 2D-NOESY spectrum of compound **3**

S10: FT-IR spectrum of compound **4**

S11–S12: <sup>1</sup>H NMR spectrum of compound **4**

S13: <sup>13</sup>C NMR spectrum of compound **4**

S14–S16: 2D-NOESY spectrum of compound **4**

## Short explanation for the spectra of compounds 3 and 4

The reaction of compound **2** with methyl amine gave a product identified as structure **3**. As shown in the 2D-NOESY spectrum in S7–S9, the interaction between pyrimidine CH at  $\delta = 7.70$  with the Me group at  $\delta = 3.52$  ppm indicates that these groups are close together and therefore the correct structure is **3**.

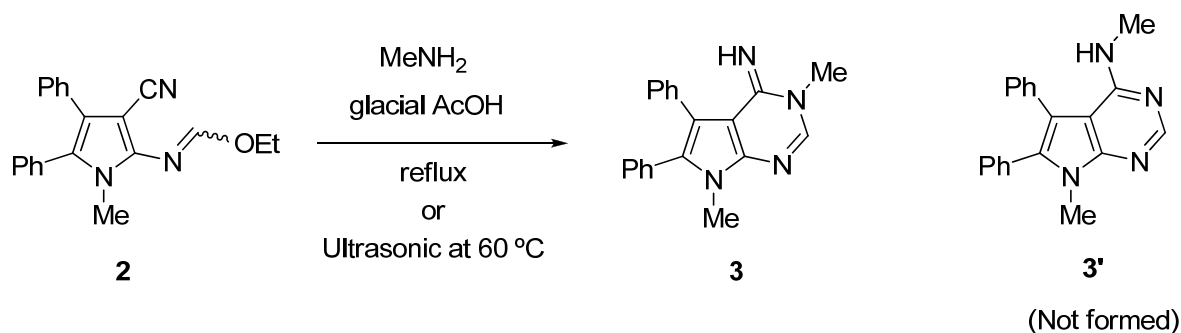

### 3,7-Dimethyl-5,6-diphenyl-3H-pyrrolo[2,3-d]pyrimidin-4(7H)-imine (**3**)

The colors are in accord with the spectra (S5–S9).

IR (KBr disk):  $\nu = 3318, 3026, 2949, 1632, 1565, 1502, 1325, 1181, 1077, 791, 758, 703\text{ cm}^{-1}$ . –  $^1\text{H}$  NMR (300 MHz,  $\text{CDCl}_3$ ,  $25^\circ\text{C}$ , TMS):  $\delta = 3.52$  (s, 3H,  $\text{CH}_3$ ),  $3.64$  (s, 3H,  $\text{CH}_3$ ),  $7.18\text{--}7.31$  (m, 11H, arom-H and NH),  $7.70$  (s, 1H, pyrimidine CH). –  $^{13}\text{C}$  NMR (75 MHz,  $\text{CDCl}_3$ ,  $25^\circ\text{C}$ , TMS):  $\delta = 29.92, 35.56, 103.19, 117.43, 126.85, 127.86, 128.30, 128.34, 130.52, 130.66, 130.84, 132.79, 134.06, 143.22, 145.59, 156.25$ . – Anal. Calcd for  $\text{C}_{20}\text{H}_{18}\text{N}_4$ : C, 76.41; H, 5.77; N, 17.82. Found: C, 76.12; H, 5.69; N, 17.91.

The reaction of compound **2** with benzyl amine gave a product identified as structure **4**. As shown in the 2D-NOESY spectrum in S14–S16, there is no interaction between pyrimidine CH at  $\delta = 8.54$  ppm with the methylene group at  $\delta = 4.70$  ppm, which indicates these groups are not close together and confirms the structure **4**.

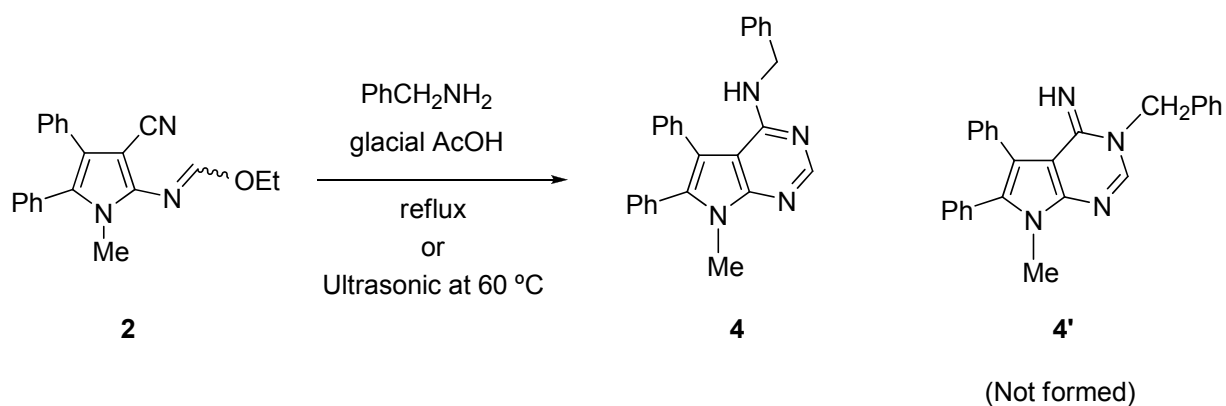

#### 4-Benzylamino-7-methyl-5,6-diphenyl-7H-pyrrolo[2,3-d]pyrimidine (**4**)

The colors are in accord with the spectra (S11–S16).

IR (KBr disk):  $\nu = 3429, 3025, 2910, 1660, 1584, 1454, 1412, 1334, 1265, 1180, 1134, 1071, 825, 795, 766\text{ cm}^{-1}$ . –  $^1\text{H}$  NMR (300 MHz,  $\text{CDCl}_3$ , 25  $^{\circ}\text{C}$ , TMS):  $\delta = 3.37$  (s, 3H,  $\text{CH}_3$ ), 4.70 (d, 2H,  $J = 5.7\text{ Hz}$ ,  $\text{CH}_2$ ), 5.38 (br, 1H, NH), 7.17–7.42 (m, 15H, arom-H), 8.54 (d, 1H,  $J = 3.6\text{ Hz}$ , pyrimidine CH). –  $^{13}\text{C}$  NMR (75 MHz,  $\text{CDCl}_3$ , 25  $^{\circ}\text{C}$ , TMS):  $\delta = 29.88, 44.61, 101.80, 113.30, 127.03, 127.15, 127.17, 128.14, 128.37, 128.53, 128.58, 130.57, 130.87, 134.47, 134.61, 138.82, 150.15, 151.97, 156.27$ . – Anal. Calcd for  $\text{C}_{26}\text{H}_{22}\text{N}_4$ : C, 79.97; H, 5.68; N, 14.35. Found: C, 80.27; H, 5.57; N, 14.21.

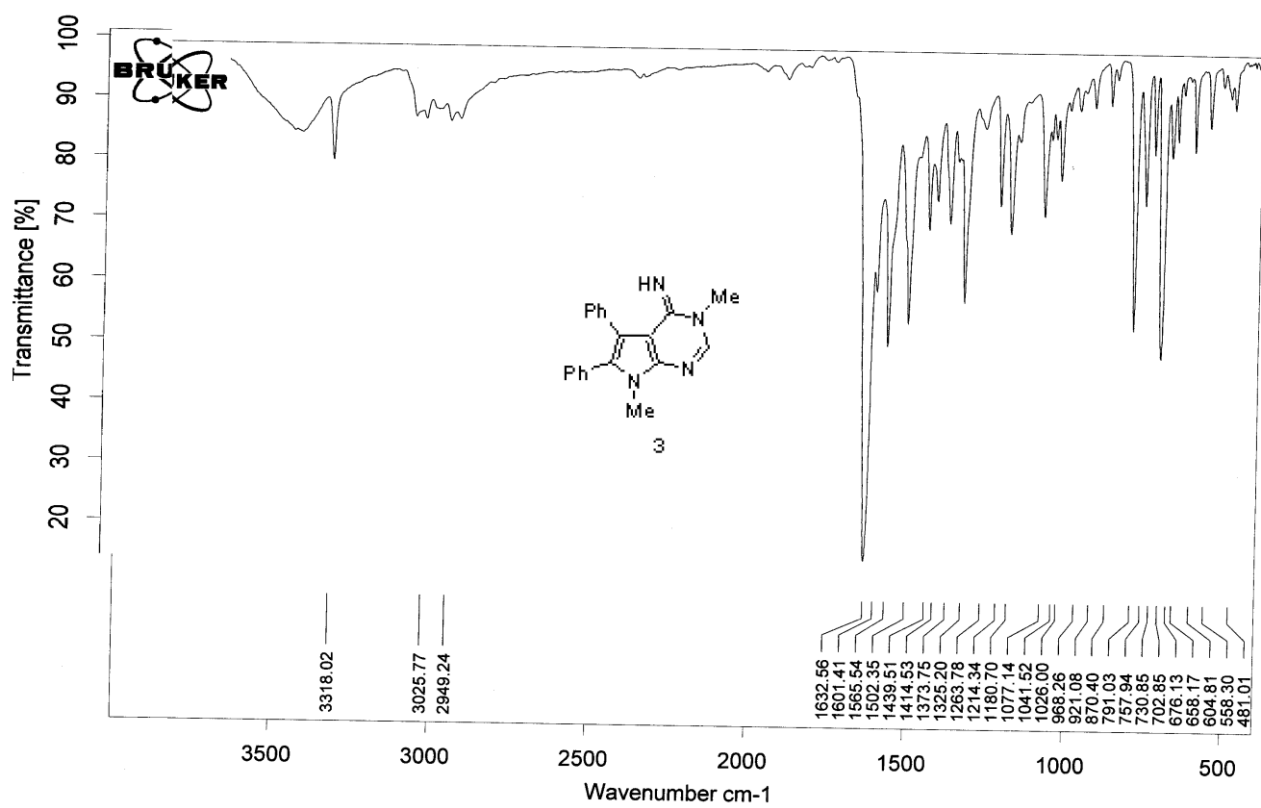

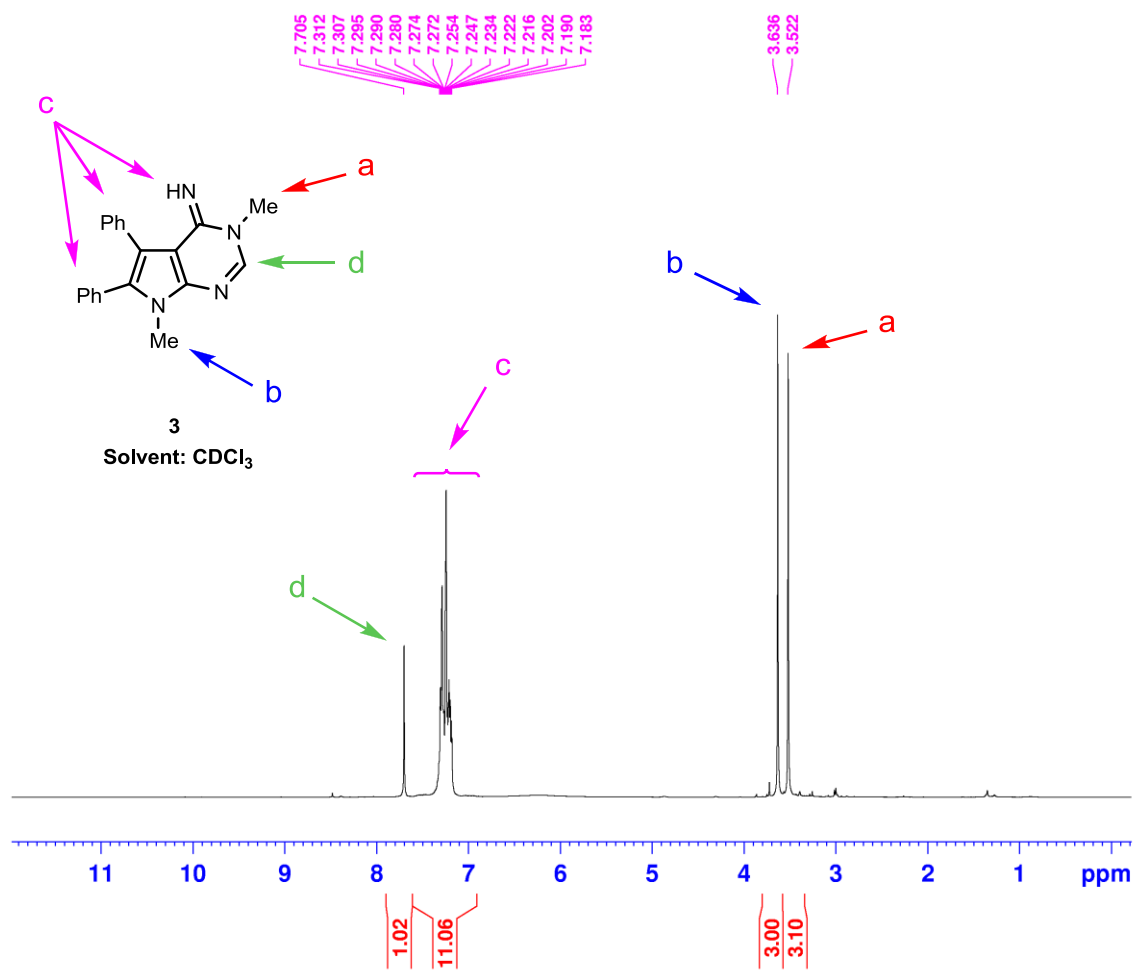

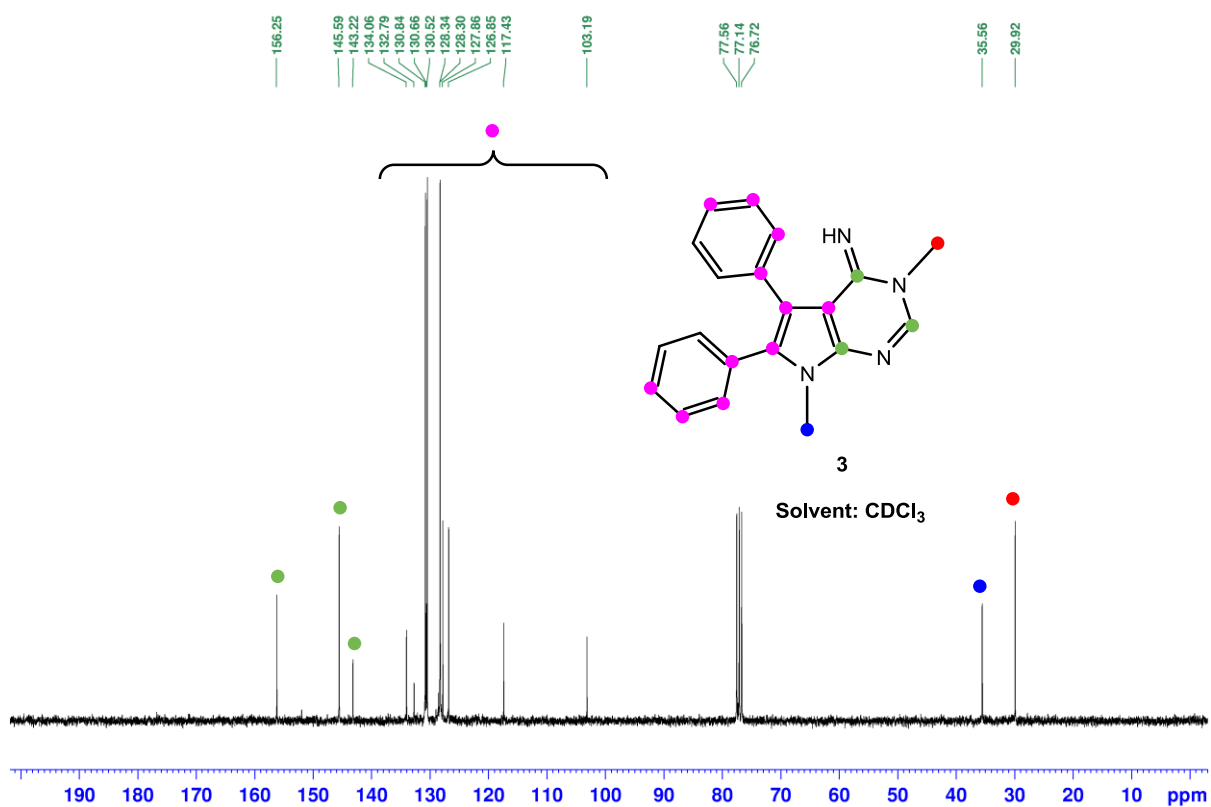



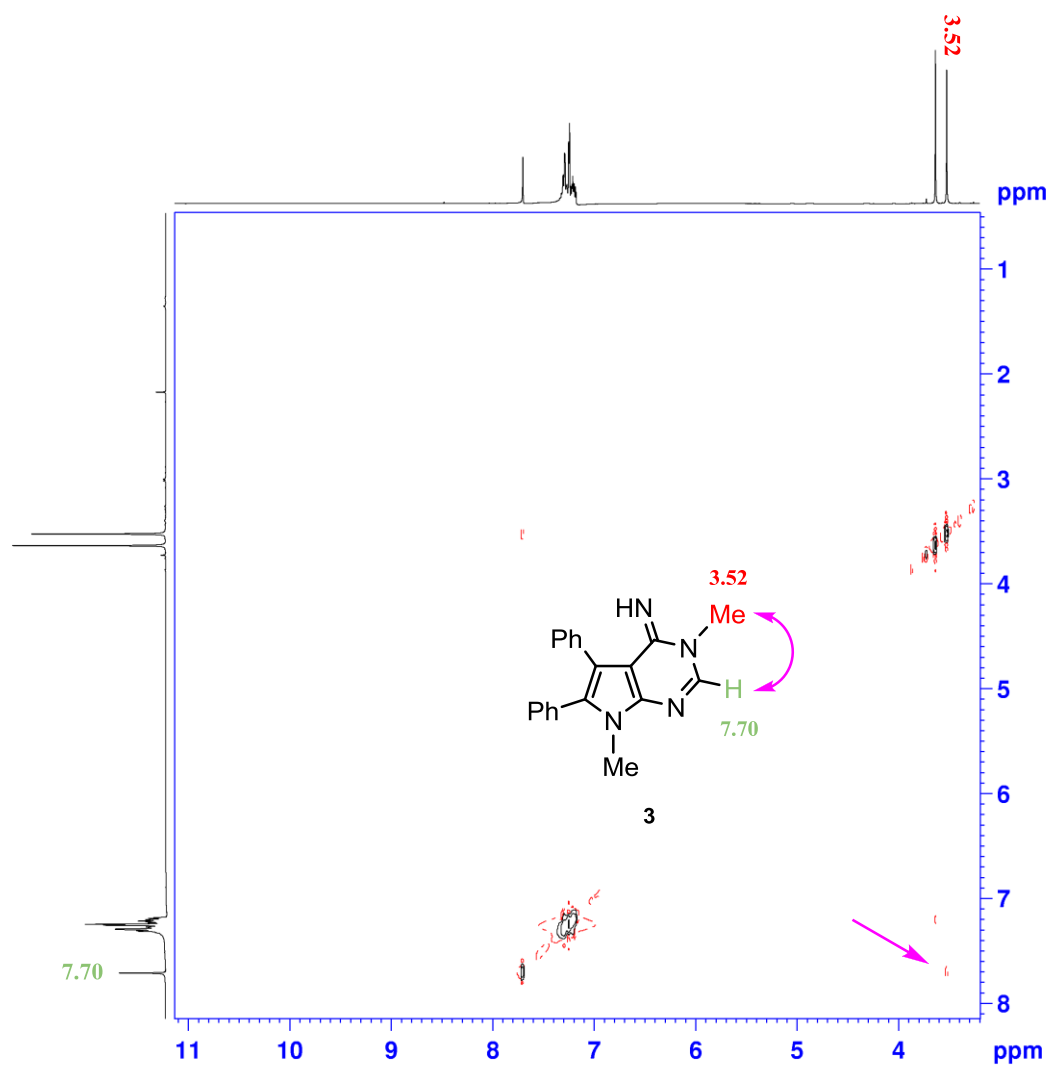

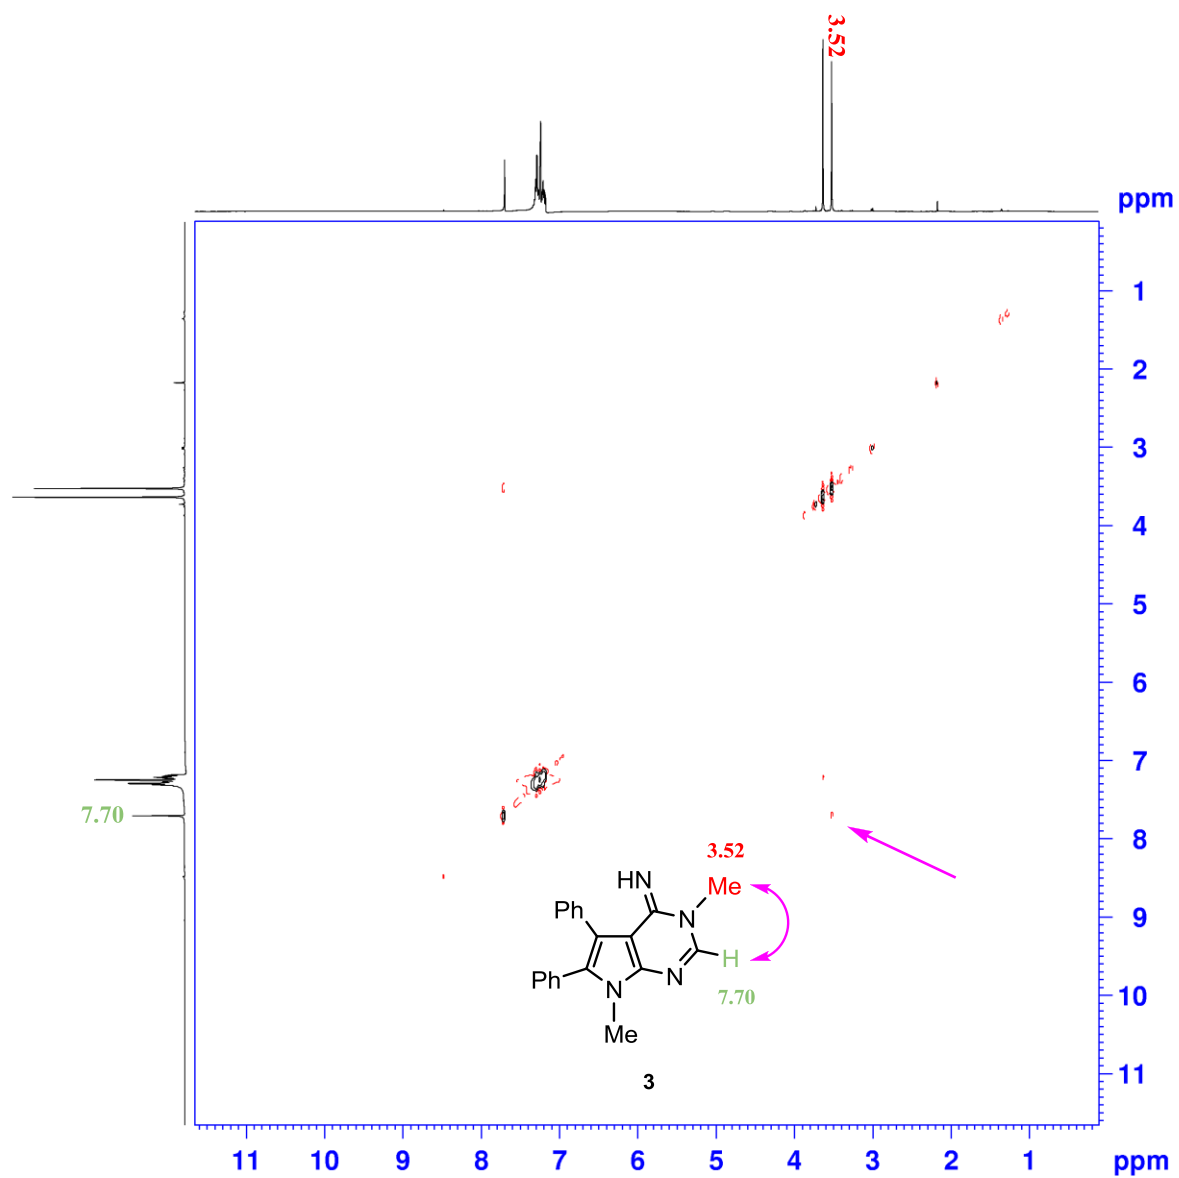

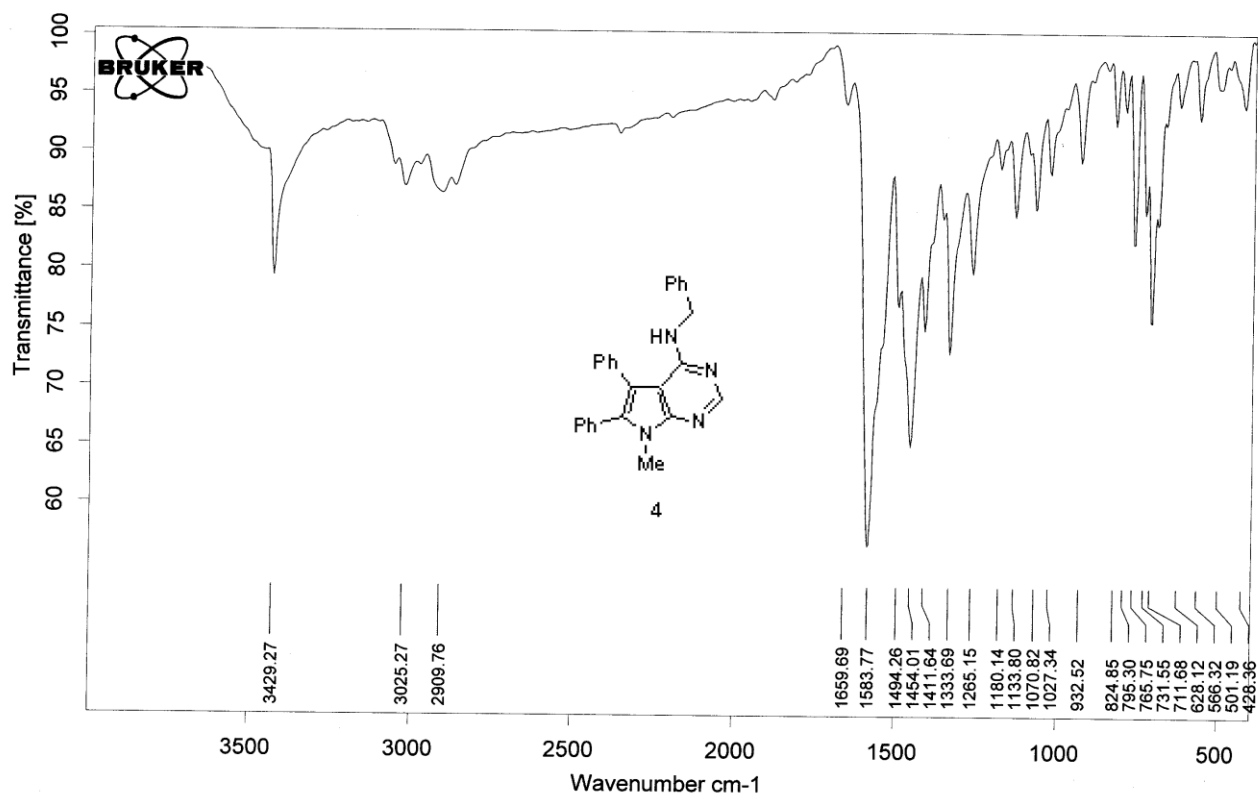

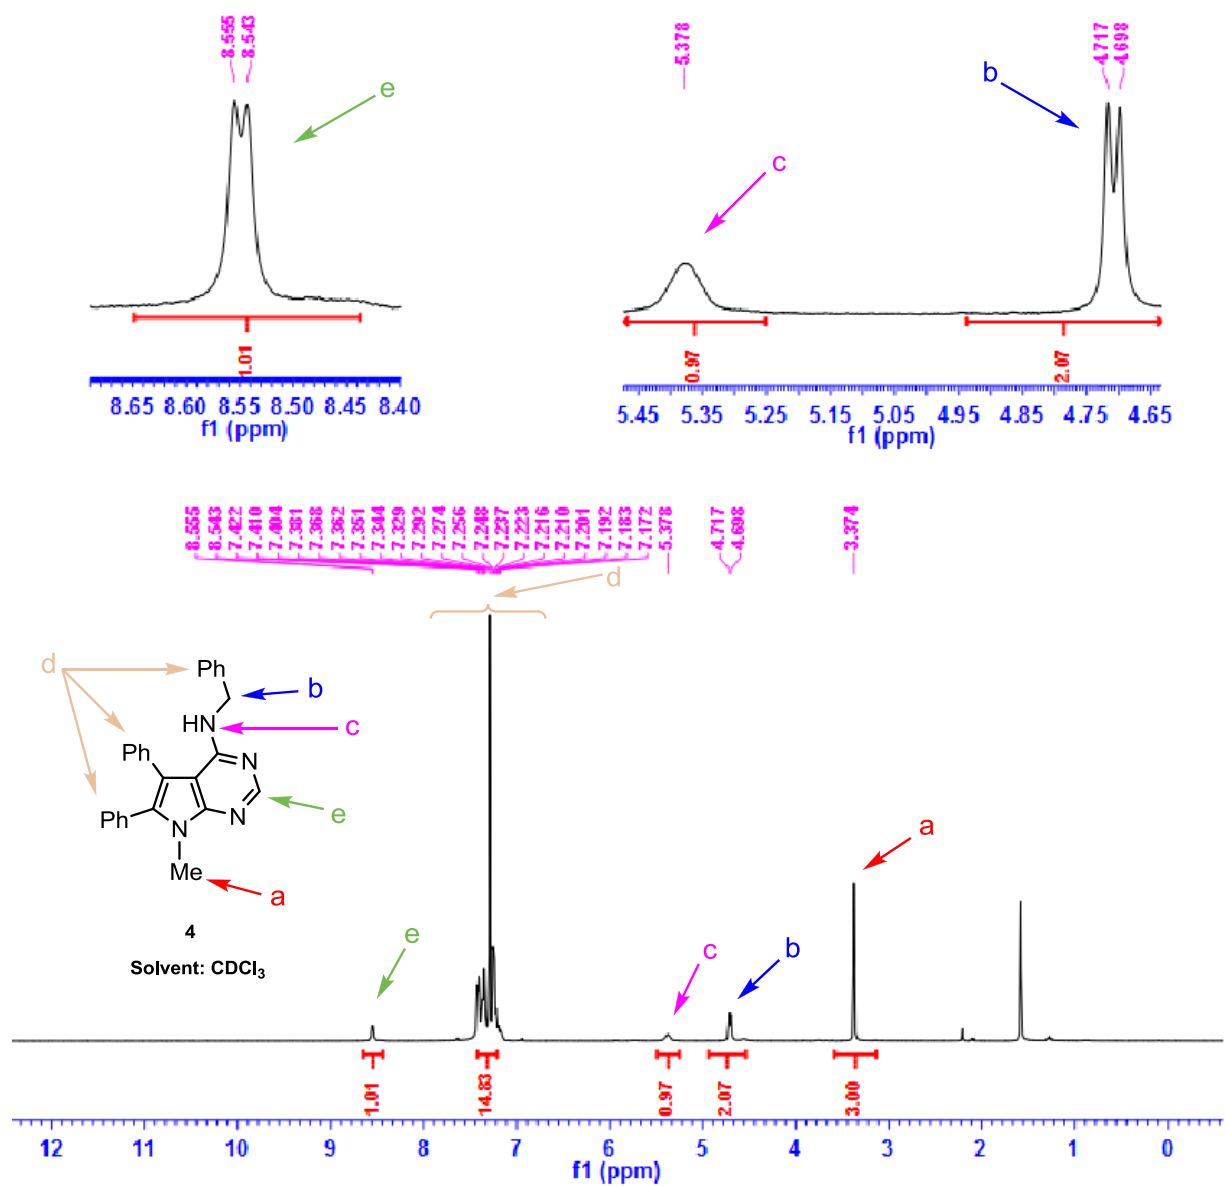

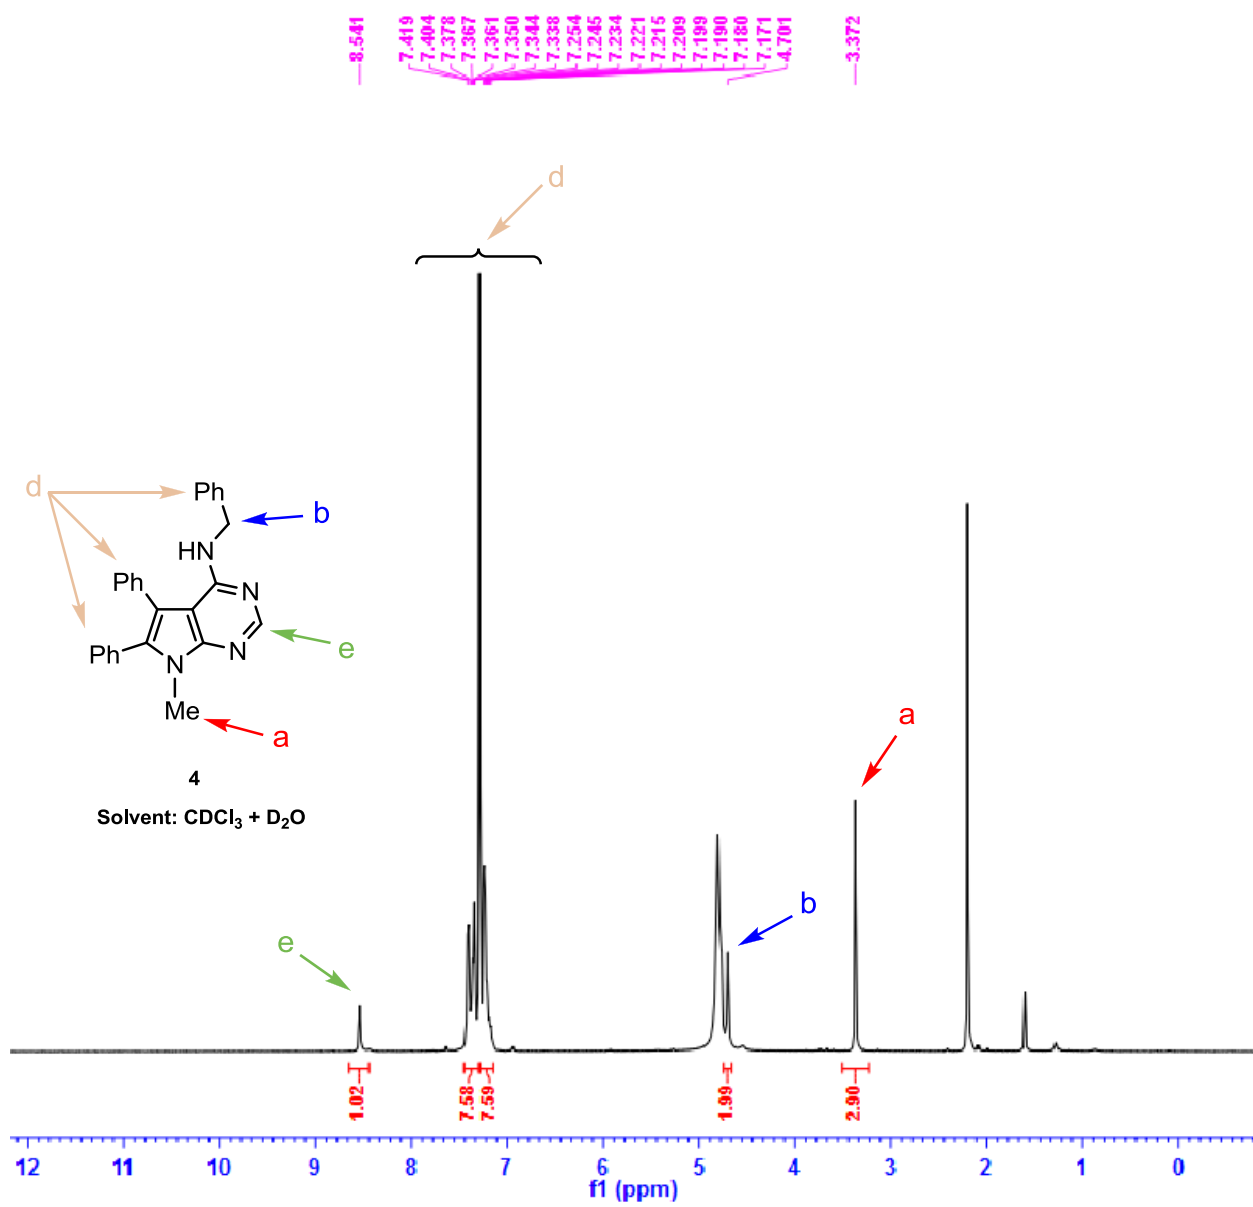

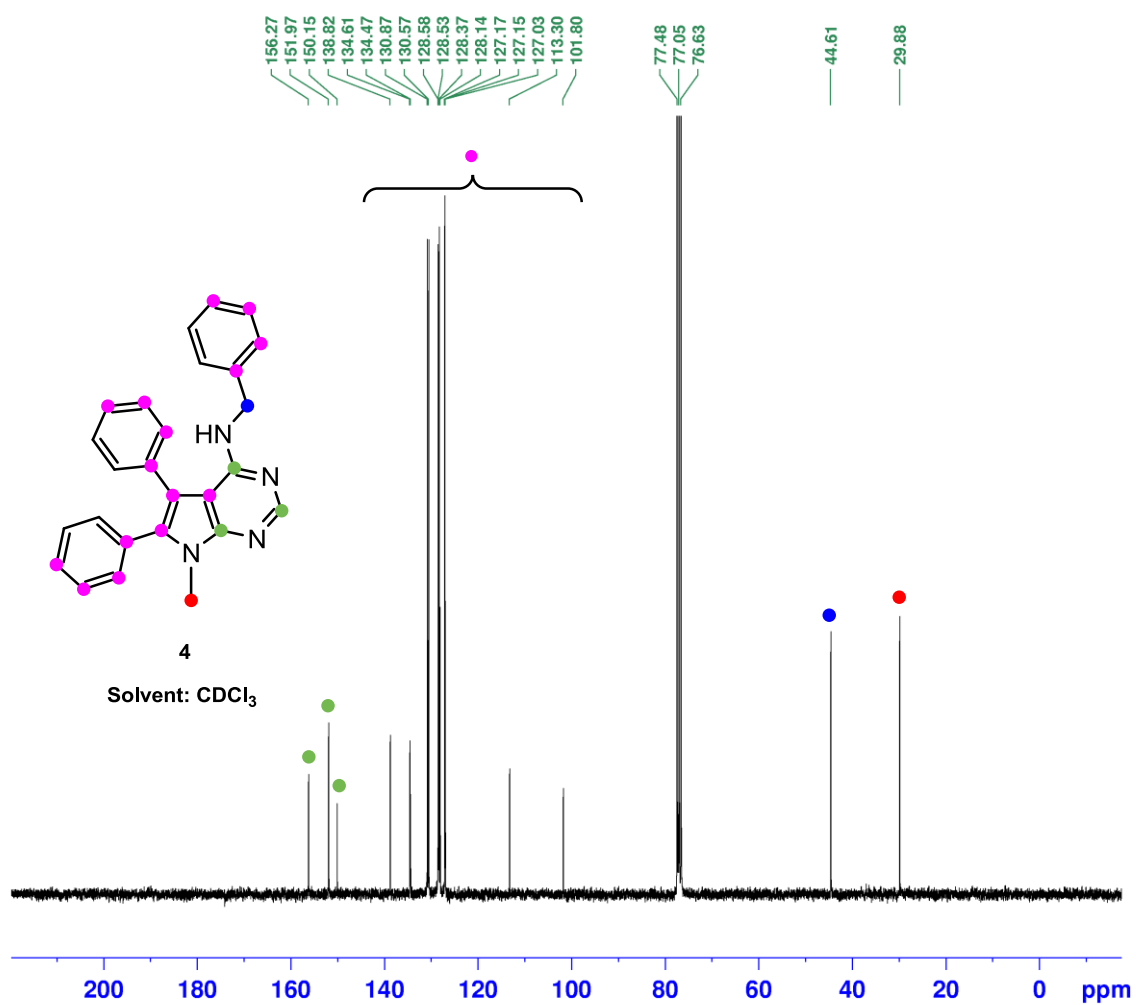

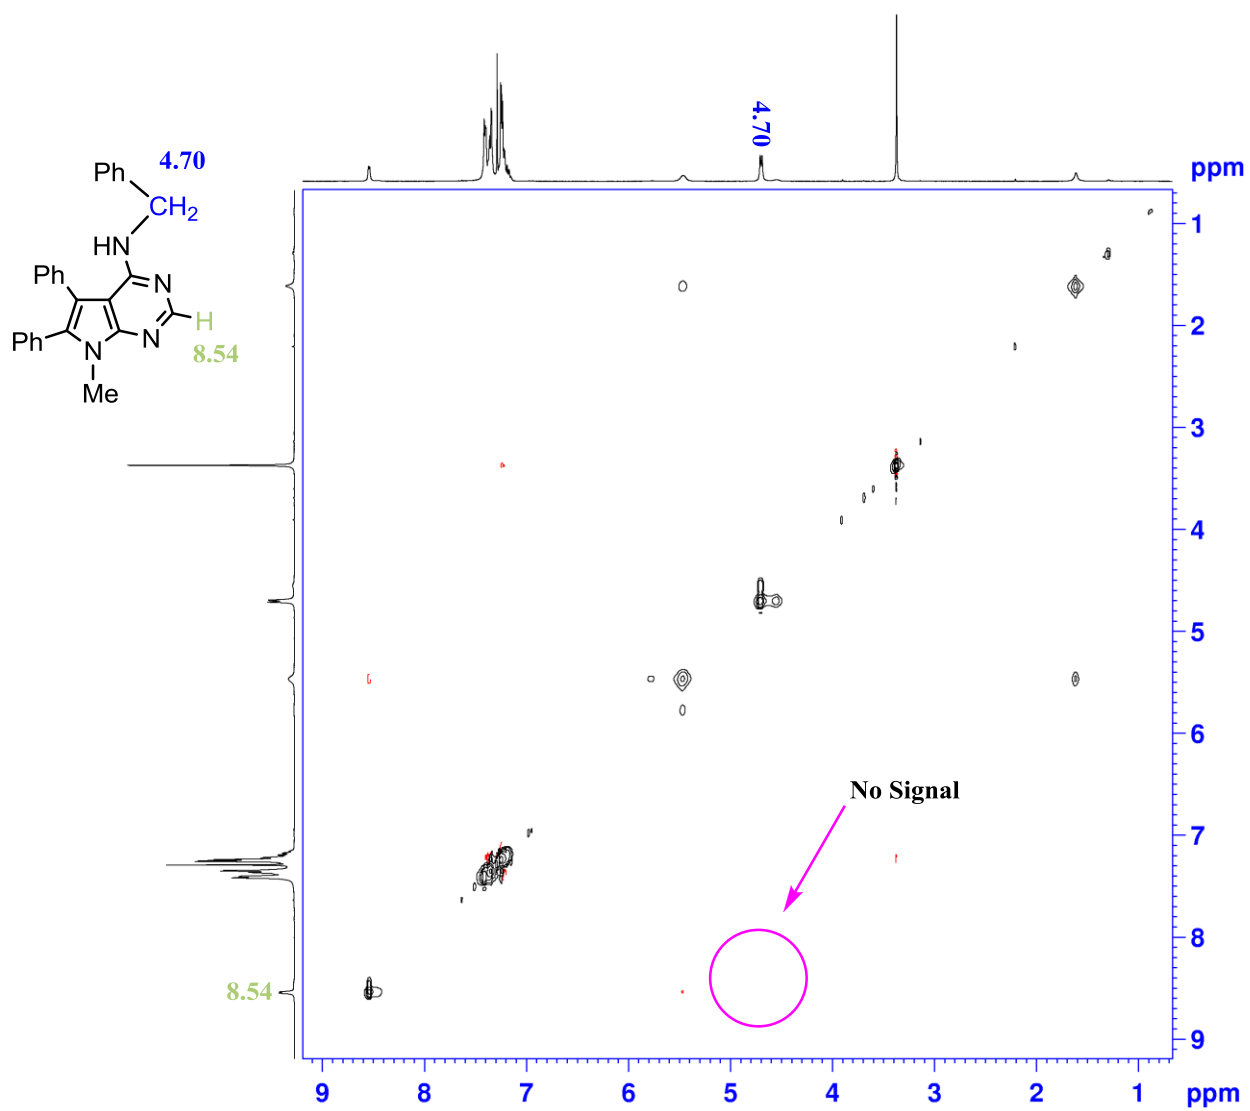

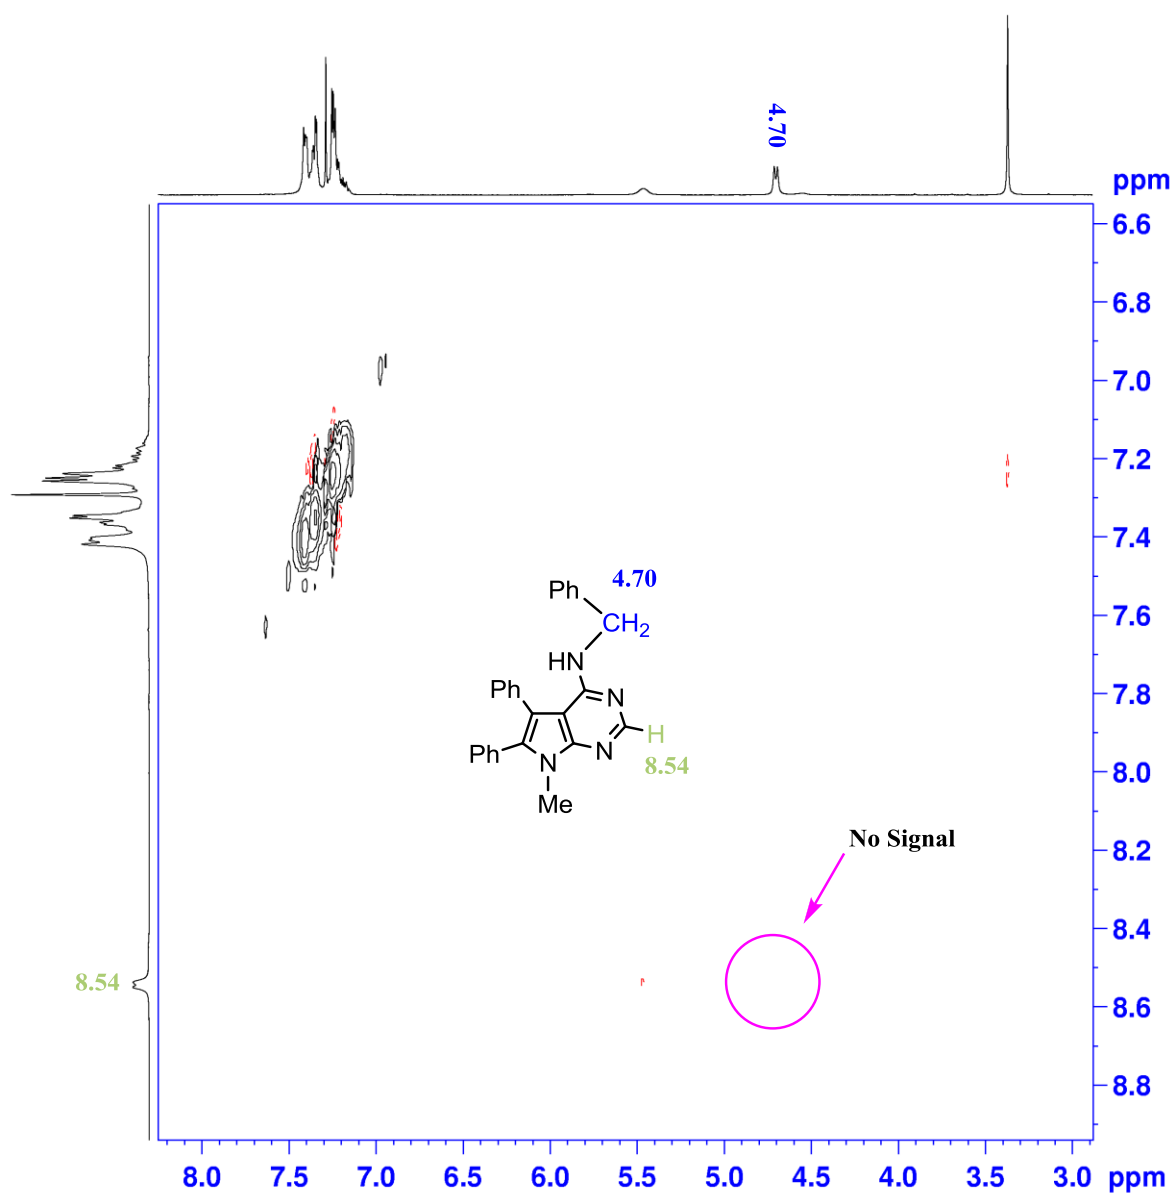

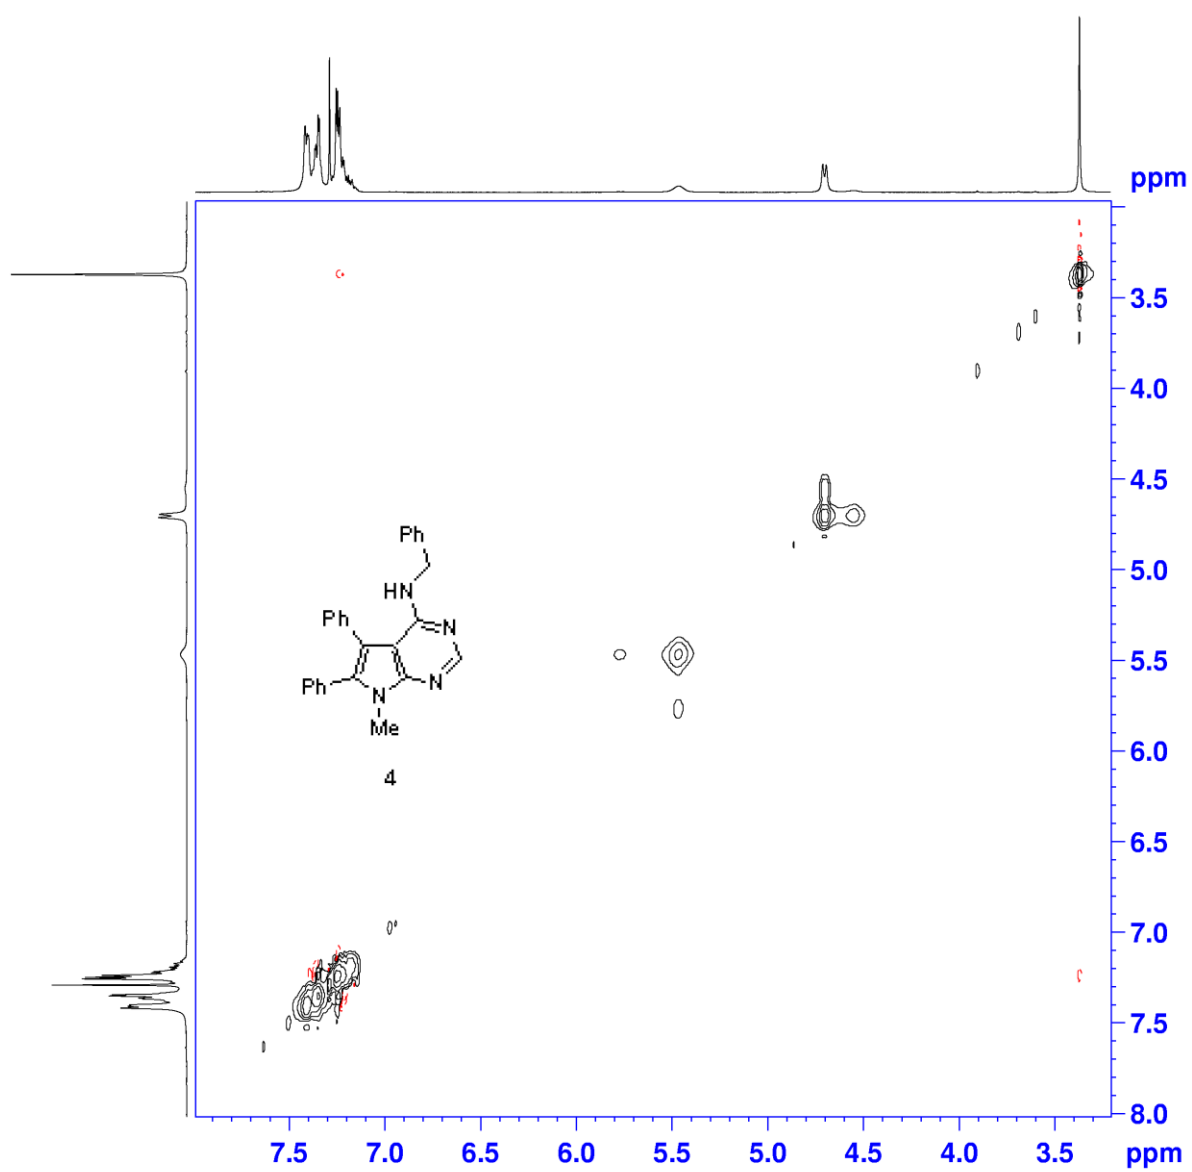

Supplement: Supplementary file 1 [file znb-2017-0004_suppl.zip]
